# Supplementary material
Source: MDPI journal article supplement (https://www.mdpi.com/1424-2818/14/6/501)
Supplement: s1 [file s1]

## **Name of the species**

### **Cladocera**

*Alona* sp. (Baird, 1843)  
*Bosmina* (*Eubosmina*) *coregoni* (Baird, 1857)  
*Bosmina* (*Eubosmina*) *crassicornis* (Lilljeborg, 1887)  
*Bosmina* (*Eubosmina*) *coregoni* (Baird, 1857)  
*Bosmina* (*Eubosmina*) *coregoni* var. *thersites* (Baird, 1857)  
*Bosmina* (*Bosmina*) *longirostris* (O.F. Müller, 1785)  
*Bythotrephes longimanus* (Leydig, 1860)  
*Ceriodaphnia pulchella* (G.O. Sars, 1862)  
*Ceriodaphnia quadrangula* (O.F. Müller, 1785)  
*Chydorus sphaericus* (O.F. Müller, 1776)  
*Daphnia cristata* (G.O. Sars, 1862)  
*Daphnia cucullata* (G.O. Sars, 1862)  
*Daphnia galeata* (Sars, 1864)  
*Daphnia hyalina* (Leydig, 1860)  
*Diaphanosoma brachyurum* (Liévin, 1848)  
*Leptodora kindtii* (Focke, 1844)  
*Leydigia leydigi* (Schödler, 1863)  
*Polyphemus pediculus* (Linnaeus, 1761)

### **Calanoida**

*Acanthodiaptomus denticornis* (Wierzejski, 1887)  
*Eudiaptomus gracilis* (Sars G.O., 1863)  
*Eudiaptomus graciloides* (Lilljeborg, 1888)  
*Eudiaptomus vulgaris* (Schmeil, 1896)  
*Heterocope appendiculata* (Sars G.O., 1863)

### **Cyclopoida**

*Acanthocyclops* sp. (Kiefer, 1927)  
*Cyclops scutifer* (Sars G.O., 1863)  
*Diacyclops bicuspidatus* (Claus, 1857)  
*Eucyclops macruioides* (Lilljeborg, 1901)  
*Mesocyclops leuckarti* (Claus, 1857)  
*Metacyclops gracilis* (Lilljeborg, 1853)  
*Microcyclops* sp. (Claus, 1893)  
*Thermocyclops oithonoides* (Sars G.O., 1863)

### **Rotifera**

*Anuraeopsis fissa* (Gosse, 1851)  
*Ascomorpha ecaudis* (Perty, 1850)  
*Ascomorpha ovalis* (Bergendahl, 1892)  
*Ascomorpha saltans* (Bartsch, 1870)  
*Ascomorpha agilis* (Zacharias, 1893)  
*Asplanchna priodonta* (Gosse, 1850)  
*Brachionus angularis* (Gosse, 1851)

*Brachionus calyciflorus* (Pallas, 1776)  
*Brachionus diversicornis* (Daday, 1883)  
*Cephalodella catellina* (Müller, 1786)  
*Collotheca mutabilis* (Hudson, 1885)  
*Collotheca pelagica* (Rousselet, 1893)  
*Conochiloides natans* (Seligo, 1900)  
*Conochilus hippocrepis* (Schränk, 1803)  
*Conochilus unicornis* (Rousselet, 1892)  
*Euchlanis dilatata* (Ehrenberg, 1832)  
*Filinia longiseta* (Ehrenberg, 1834)  
*Gastropus stylifer* (Imhof, 1891)  
*Hexarthra mira* (Hudson, 1871)  
*Kellicottia longispina* (Kellicott, 1879)  
*Keratella cochlearis* (Gosse, 1851)  
*Keratella tecta* (Gosse, 1851)  
*Keratella quadrata* (Müller, 1786)  
*Lecane closterocerca* (Schmerda, 1859)  
*Lecane luna* (Müller, 1776)  
*Lecane* sp. (Nitzsch, 1827)  
*Ploesma hudsoni* (Imhof, 1891)  
*Ploesma truncatum* (Levander, 1894)  
*Polyarthra dolichoptera* (Idelson, 1925)  
*Polyarthra longiremis* (Carlin, 1943)  
*Polyarthra major* (Burckhardt, 1900)  
*Polyarthra remata* (Skorikov, 1896)  
*Polyarthra vulgaris* (Carlin, 1943)  
*Polyarthra euryptera* (Wierzejski, 1891)  
*Pompholyx complanata* (Gosse, 1851)  
*Pompholyx sulcata* (Hudson, 1885)  
*Proalides tentaculatus* (De Beauchamp, 1907)  
*Synchaeta kitina* (Rousselet, 1902)  
*Synchaeta lakowitziana* (Lucks, 1930)  
*Synchaeta pectinata* (Ehrenberg, 1832)  
*Synchaeta* sp. (Ehrenberg, 1832)  
*Testudinella parva* (Ternetz, 1892)  
*Trichocerca capucina* (Wierzejski & Zacharias, 1893)  
*Trichocerca cylindrica* (Imhof, 1891)  
*Trichocerca pusilla* (Jennings, 1903)  
*Trichocerca Rousseleti* (Voigt, 1902)  
*Trichocerca similis* (Wierzejski, 1893)  
*Synchaeta oblonga* (Ehrenberg, 1832)  
*Synchaeta stylata* (Wierzejski, 1893)  
*Euchlanis* (Ehrenberg, 1832)
